# Supplementary material for: Generation of bright autobioluminescent bacteria by chromosomal integration of the improved lux operon ilux2
Source: bioRxiv or medRxiv preprint supplement (doi:10.1101/2021.12.10.472100), 2021-12-11
Supplement: Supplementary file [file media-1.pdf]

>ilux2C

ATGACTAAAAAATTTTCATTCATTATTAATGGCCAGGTAGAAATCTTTCCCGAAAGCGATGAT  
TTAGTGCAATCCATCACTTTTGGTGATAATAGTGTTTACCTGCCAATATTGAACGACTCTCAT  
GTAAAACCATTACTGATTGTAATGGAAATAACGACTTACGGTTGCATGACATTGTCAATTTT  
CTCTATACGGTAGGGCAAAGATGGAAAAATAATGAATACCCAAGACGCAGGACATACATTC  
GTGACTTAAAAAATATATGGGATATTCAGAAGAAATGGCTAAGCTAGAGGCCAATTGGATA  
TCTATGATATTATGTTCTAAAGGCGGCCTTTATGATGTTGTAGAAAATGAACTTGGTTCTCGC  
CATATCATGGATGAATGGATACCTCAGGGTGAAAGTTATGTTCCGGGCTTTTCCGAAAGGTAA  
ATCCGTACATCTGTTGGCAGGTAATGTTCCATTATCTGGGATCATGTCTATATTACGTGCAA  
TTTTAACTAAGAATCAGTGTATTATAAAAACATCGTCAACCGATCCTTTTACCGCTAATGCAT  
TAGCTTTAAGTTTTATTGATGTAGACCCTAATCATCCGATAACGCGCTCTTTATCTGTTATAT  
ATTGGCCCCACCAAGGTGATATATCACTCGCAAAGAAATTATGCGACATGCGGATGTTATT  
GTCGCATGGGGAGGGCCAGATGCGATTAATTGGGCGGTAGAGCATGCGCCATCTAATGCT  
GATGTGATTAATTTGGTCCTAAAAAGAGCCTTTGCATTATCGATAATCCTGTTGATCTGAC  
GTCTGCAGCGACAGGTGCGGCTCATGATGTTTGTTTTACGATCAGCGAGCTTGCTTTTCT  
GCCAAAACATATATTATATGGGAAATCATTATGAGGAATTTAAGTTGGCATTGATAGAAAAA  
CTTAATCTATATGCGCATATATTACCGAATGCAAAAAAAGATTTTGATGAAAAGGCGGCCTA  
TTCTTTAGTTCAAAAAGAGAGCTTGTTTGCCGATTAAATGTAGAGGCGGATATTCATCAAC  
GTTGGACGATTATTGAGTCAGATGCAGGTGTGGAATTTAATCAACCACTTGGCAGATGTGT  
GTACCTTCATCACGTCGATAAATTGAGCAAATATTGCCTTATGTTCAAAAAAATAAGACGCA  
AACCATATCTATTTTTCTTGGGAGTCATCATTTAAATATCGAGATGCGTTAGCATTAGAAGG  
TGCGGAAAGGATTGTAGAAGCAGGAATGAATAACATATTTTCGAGTTGGTGGATCTCATGAC  
GGAATGAGACCGTTGCAACGATTAGTGAAGTATATTTCTCATGAAAGGCCATCTAACTATAC  
GGCTAAGGATGTTGCGGTTGAAATAGAACAGACTCGTTTCCTGGAAGAAGACAAGTTCCTT  
GTATTTGTCCATAA

>ilux2D

ATGGAAAAGAATCAAATATAAAACCATCGACCACGTTATTTGTGTTGAAGGAAATAAAAA  
ATTCATGTTTGGGAAACGCTGCCAGAAGAAAACAGCCCAAAGAGAAAGAATGCCATTATTAT  
TGCCTCTGGTTTTGCCCGCAGGATGGATCATTTTGCTGGACTGGCGGAATATTTATCGCGG  
AATGGGTTTCATGTGATCCGCTATGATTCGCTTCACCACGTTGGATTGAGTTCAGGGACAAT  
TGATGAATTTACAATGTCTACAGGAAAGCAGAGCTTGTTAGCAGTGGTTGATTGGTTAACTA  
CACGAAATATAAGTAACTTCGGTGTGTTGGCTTCAAGCTTATCTGCGCGGATAGCTTATGCA  
AGCCTATCTGAAATCAATGCTTCGTTTTAATCACCGCAGTCGGTGTGTTAACTTAAGATAT  
TCTCTTGAAAGAGCTTTAGGGTTTGATTATCTCAGTCTTCCATTAATGAATTGCCGAAAAAT  
CTAGTTTTTTGAAGGCCATAAATTGGGTGCTGAAGTCTTCGCGAGAGATTGTCTTGATTTTGG  
TTGGGAAGACTTAGCTTCTACAATTAATAACATGATGTATCTTGATATACCGTTTATTGCTTT  
TACCGCAAATAACGACAATTGGGTCAAGCAAGATGAAGTTATCACATTGTTATCAAATATTC  
GAAGTAATCGATGTAGGATATATTCTTTGTTAGGAAGTTCGCATGACTTGAGTAAAATTTA  
GTGGCCCTGCGCAATTTTTATCAATCGGTTACGAAAGCCGCTATCGCGATGGATAATGATC  
ATCTGGATATTAATGTTGATATTACTGAACCGTCATTTGAACATTTAACTATTGCGACAGTCA  
ATGAACGCCGAATGAGAATTGAGATTGTAAATCAAGCAATTTCTCTGTCTTAA

>*ilux2A*

ATGAAATTTGGAACTTTTTACTTACATACCAACCTCCCCAATTTTCTCAAACAGAGGTAATG  
GAACGTTTGGTTAAATTAGGTCGCATCTCTGAGGAGTGTGGTTTTGATACCGTATGGTACT  
GGAGCATCATTTACGGAGTTTGGTCTACTTGGTAACCCTTATGTCGCTGCTGCATATTTAC  
TTGGCGCGACTAAAAAATTGAATGTAGGAACCGCCGCTATTGTTCTTCCCACAGCCCATCC  
AGTACGCCAACTTGAAGATGTGAATTTATTGGATCAAATGTCAAAGGACGATTTCCGGTTTG  
GTATTTGCCGAGGGCTTTACAACAAGGACTTTTCGCGTATTCGGCGCGGATATGAATAACAG  
TCGCGCCTTAGCGGAATGCTGGTACGGGCTGATAAAGAATGGCATGACAGAGGGATATAT  
GGAAGCTGATAATGAACATATCAAGTTCATAAGGTAAAAGTAAACCCCGCGGCGTATAGC  
AGAGGTGGCGCACCGGTTTATGTGGTGGCTGAATCAGCTGCGACGACTGAGTGGGCAGCT  
CAATTTGGCCTACCGATGATATTAAGTTGGATTATAAATACTAACGAAAAGAAAGCACAACTT  
GAGCTTTATAATGAGGTGGCTCAAGAATATGGGCACGATATTCATAATATCGACCATTGCTT  
ATCATATATAACATCTGTAGATCATGACTCAATTAAGCGAAAGAGATTTGCCGGAAATTTCT  
GGGGCATTGGTATGATTCTTATGTGAATGCTACGACTATTTTTGATGATTCAGACCAAACAA  
GAGGTTATGATTTCAATAAAGGGCAGTGGCGTGACTTTGTATTAAGGACATAAAGATACT  
AATCGCCGTATTGATTACAGTTACGAAATCAATCCCGTGGGAACGCCGCAGGAATGTATTG  
ACATAATTCAAAAAGACATTGATGCTACAGGAATATCAAATATTTGTTGTGGATTTGAAGCTA  
ATGGAACAGTAGACGAAATTATTGCTTCCATGAAGCTCTTCCAGTCTGATGTCATGCCATTT  
CTTAAAGAAAAACAACGTTTCGCTATTATATTAG

>*ilux2B*

ATGAAATTTGGATTGTTCTTCCTTAACTTCATCAATCCGACAACACTGTTCAAGAACAAAGTATA  
GTTTCGCATGCAGGAAATAACGGAGTATGTTGATAAGTTGAATTTTGAACAGATTTTAGTGTA  
TGAAAATCATTTCAGATAATGGTGTGTCGGCGCTCCTCTGACTGTTTCTGGTTTTCTGCT  
CGGTTTAAACAGAGAAAATTAATGGTTCATTAAATCACATCATTACAACACTCATCATCCTGT  
CCGCATAGCGGAGGAAGCTTGCTTATTGGATCAGTTAAGTGAAGGGAGATTTATTTTAGGG  
TTTAGTGATTGCGAAAAAAGATGAAATGCATTTTTTAATCGCCCGGCTGAATATCAACA  
GCAACTATTTGAAGAGTGTTATGAAATCATTAAACGATGCTTTAACAACAGGCTATTGTAATCC  
AGATAACGATTTTTATAGCTTCCCTAAAATATCTGTAAATCCCCATGCTTATACGCCAGGCG  
GACCTCGGAAATATGTAACAGCAACCAGTCATCATATTGTTGAGTGGGCGGCCAAAAAAGG  
TATTCCTCTCATCTTTAAGTGGGATGATTCTAATGATGTTAGATATGAATATGCTGAAAGATA  
TAAAGCCGTCGCGGATAAATATGACGTTGACCTATCAGAGATAGACCATCAGTTAATGATAT  
TAGTTAACTATAACGAAGATAGTAATAAAGCTAAACAAGAGACGCGTGCATTTATTAGTGATT  
ATGTTCTTGAAATGCACCCTAATGAAGATTTGAAAATAAACTTGAAGAAATAATTGCAGAAA  
ACGCTGTCGGAAATTATACGGAGTGATAACTGCGGCTAAATTGGCAATTGAAAAGTGTGG  
TGCGAAAAGTGTATTGCTGTCCTTTGAACCAATGAATGATTTGATGAGCCAAAAAATGTAA  
TCAATATTGTTGATGATAATATTAAGAAGTACCACATGGAATATACCTAA

>*ilux2E*

ATGACTTCATATGTTGATAAACAAGAAATTACAGCAAGCTCAGAAATTGATGATTTGATTTTT  
TCGAGCGATCCATTAGTGTGGTCTTACGACGAGCAGGAAAAAATCAGAAAGAACTTGTGC  
TTGATGCATTTTCGTAATCATTATAAACATTGTGCGAGAATATCGTCACTACTGTCAGGCACACA  
AAGTAGATGACAATATTACGGAAATTGATGACATACCTGTATTCCCAACATCGGTTTTTAAGT  
TACTCGCTTATTAACCTTCTCAGGAAAACGAGATTGAAAGTTGGTTTACCAGTAGCGGCACG  
AATGGTTTTAAAAAGTCAGGTGGCGCGTGACAGATTAAGTATTGAGAGACTCTTAGGCTCTG  
TGAGTTATGGCATGAAATATGTTGGTAGTTGGTTTGATCATCAAATAGAATTAGTCAATTTGG  
GACCAGATAGATTTAATGCTCATAATATTTGGTTTAAATATGTTATGAGTTTGGTGGAATTGT  
TATATCCTACGACATTTACCGTAACAGAAGAACGAATAGATTTTGTAAAACATTGAATAGTC  
TTGAACGAATAAAAAATCAAGGGAAAGATCTTTGTCTTATTGGTTCGCCATACTTTATTTATT  
TACTCTGCCATTATATGAAAGATAAAAAAATCTCATTTTTCTGGAGATAAAAGCCTTTATATCA  
TAACCGGAGGCGGCTGGAAAAGTTACGAAAAAGAATCTCTGAAACGTGATGATTTCAATCA  
TCTTTTATTTGATACTTTCAATCTCAGTGATATTAGTCAGATCCGAGATATATTTAATCAAGTT  
GAACTCAACACTTGTTCCTTTGAGGATGAAATGCAGCGTAAACATGTTCCGCCGTGGGTATA  
TGC GCGAGCGCTTGATCCTGAAACGTTGAAACCTGTACCTGATGGAACGCCGGGGTTGAT  
GAGTTATATGGATGCGTCAGCAACCAGTTATCCAGCATTTATTGTTACCGATGATGTCGGGA  
TAATTAGCAGAGAATATGGTAAGTATCCCGGCGTGCTCGTTGAAATTTACGTCGCGTCAAT  
ACGAGGACGCAGAAAGGGTGTGCTTTAAGCTTAACCGAAGCGTTTGATAGTTGA

>ilux2frp

ATGGTGAAGATACAGCCCATCCCCACAACCTAGCCAGGGCAGCCTTTTTATAATGAATAGCA  
CCATAGAGACAATCCTGGGCCATAGATCCATTAGGAAGTTCACATCTGAACCTATTGCTAGT  
GAGCAGCTGCAAACGATTCTTCAGTCTGGGCTCGCTGCTTCAAGCTCATCCATGCTGCAGG  
TTGTGAGTATAATTCTGGGTTACAGACACGGAAAAGAGAAAATTGCTCGCTCAATATGCCGG  
CAACCAGACGTATGTGGAATCCGCTGCTGAGTTCCTGGTCTTTTGTATAGACTACCAGCGA  
CACGCTACTATCAACCCCGATGTCCAAGCTGACTTTACCGAGCTGACCCTGATTGGTGCAG  
TGGATTCCGGCATAATGGCCCAGAATTGCCTCCTGGCAGCAGAATCAATGGGTCTTGGCG  
GAGTCTATATCGGAGGACTTCGGAACTCAGCTGCCCAAGTGGATGAGTTGCTCGGACTGC  
CCAAGAACACAGCTATCCTCTTCGGAATGTGCTTGGGGCACCCCGATCAGAGCCCTGAGA  
CAAAGCCTAGACTGCCCGCTCATGTGATCGTGCACGAGAACCAATATCAAGCTCTGAACAT  
TGACGACGTACAGGCGTATGACAAAACATTGCAGGAGTATTATGCCAGCAGAACCAGCAAC  
CAGAAGCAGAGTGTCTGGTCCCAGGAACTGCAGGCAAGCTGGCCGGAGAATCCCTCCCA  
CACATCCTGCCATACCTGAACTCCAAGGGCCTTGCCAGAAGGTAA
